# Supplementary material for: Fluoroquinolone Amorphous Polymeric Salts and Dispersions for Veterinary Uses
Source: PubMed Central journal article supplement (PMC6631417; doi:10.3390/pharmaceutics11060268), 2019-06-09
Supplement: pharmaceutics-11-00268-s001.pdf [file pharmaceutics-11-00268-s001.pdf]

Supporting Information

# Fluoroquinolone amorphous polymeric salts and dispersions for veterinary uses

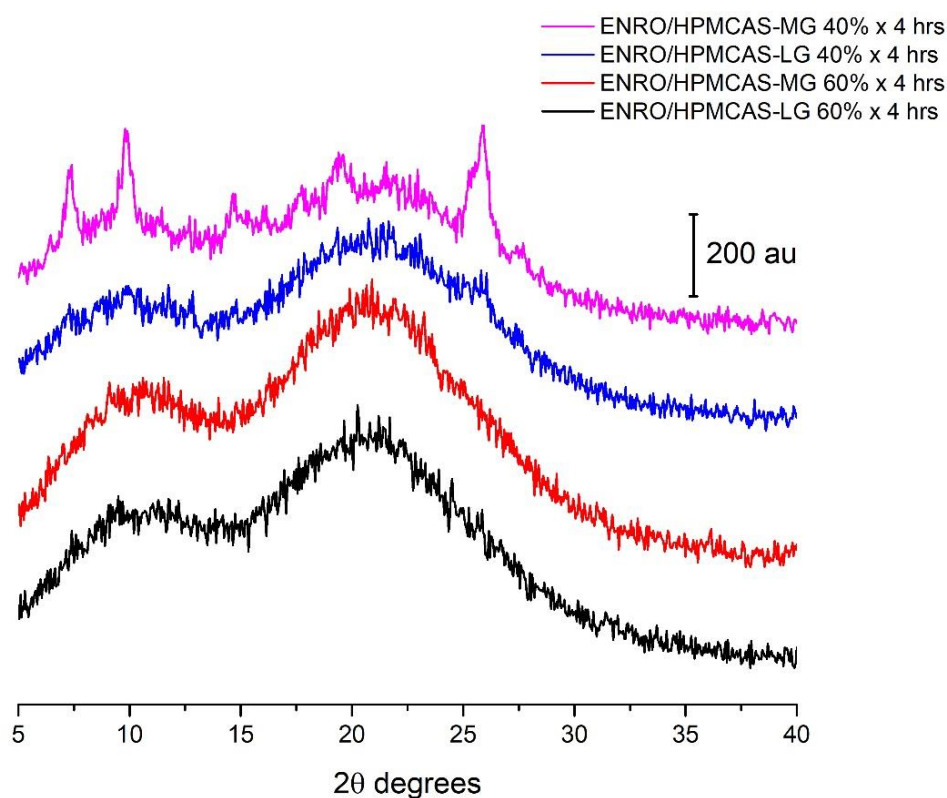

**Figure S1.** PXRD analysis of solid dispersions formed by milling ENRO with 40–60% (w/w) HPMCAS-LG and HPMCAS-MG for 4 hours at room temperature.

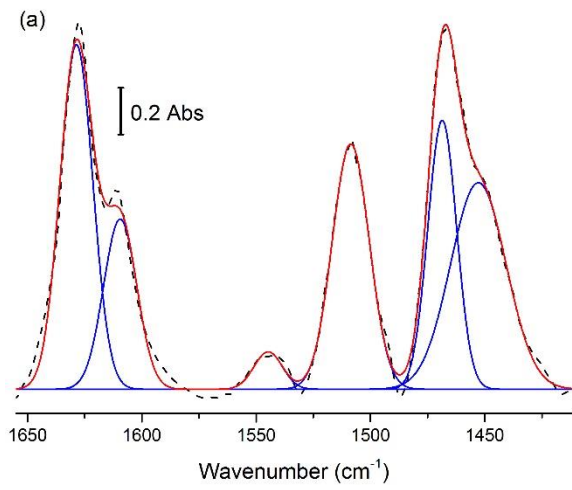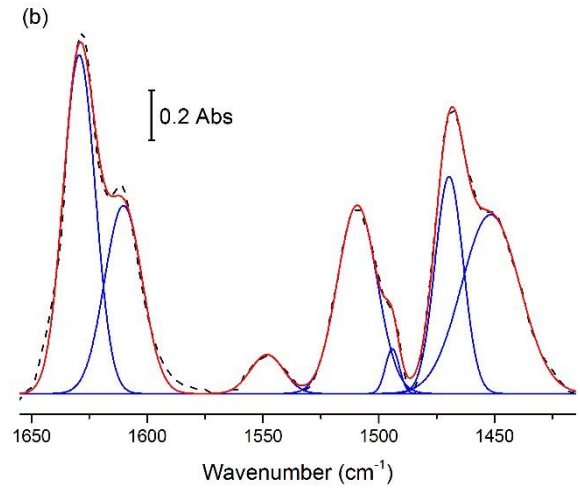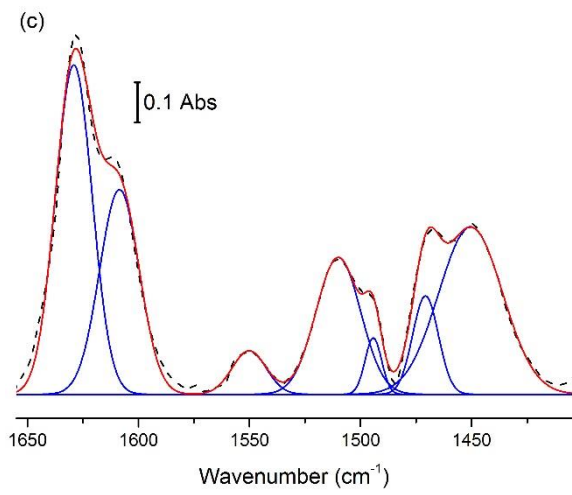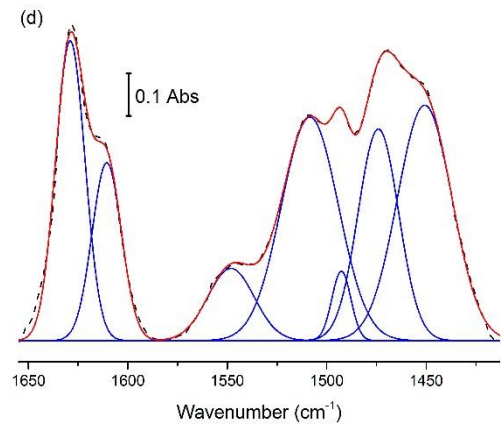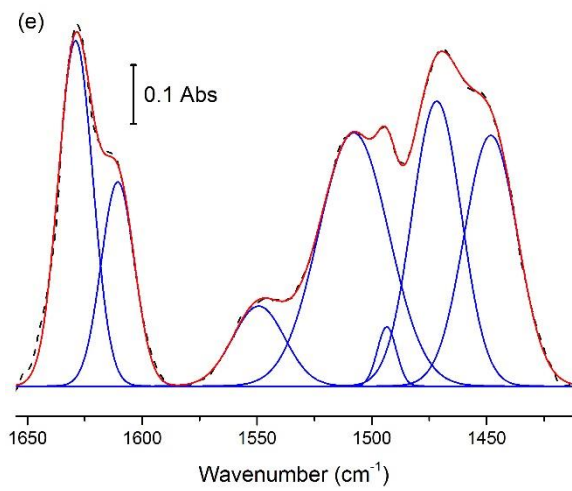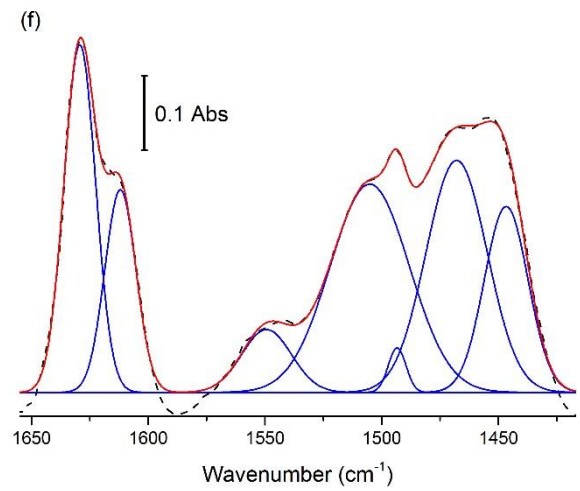

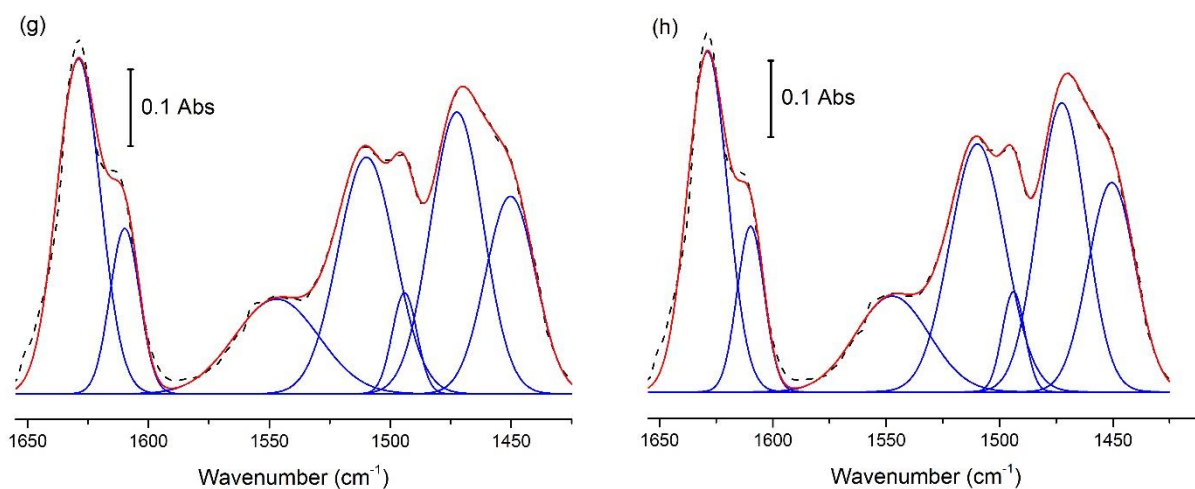

**Figure S2.** FTIR peak deconvolution of (a) crystalline ENRO (b) ball milled ENRO (c) quench cooled ENRO (d) ENRO/Eudragit L100 (e) ENRO/Eudragit L100-55 (f) ENRO/Carbopol (g) ENRO/HPMCAS-LG and (h) ENRO/HPMCAS-MG. Dotted black line: recorded spectrum; solid blue lines: deconvoluted individual Gauss peaks; and solid red line: sum of the component peaks.

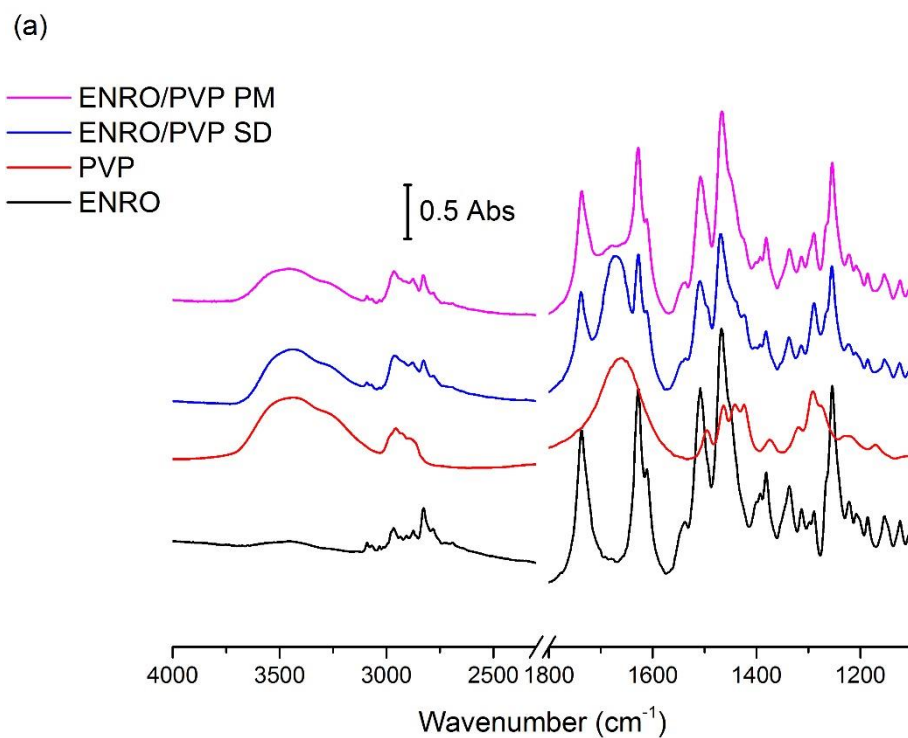

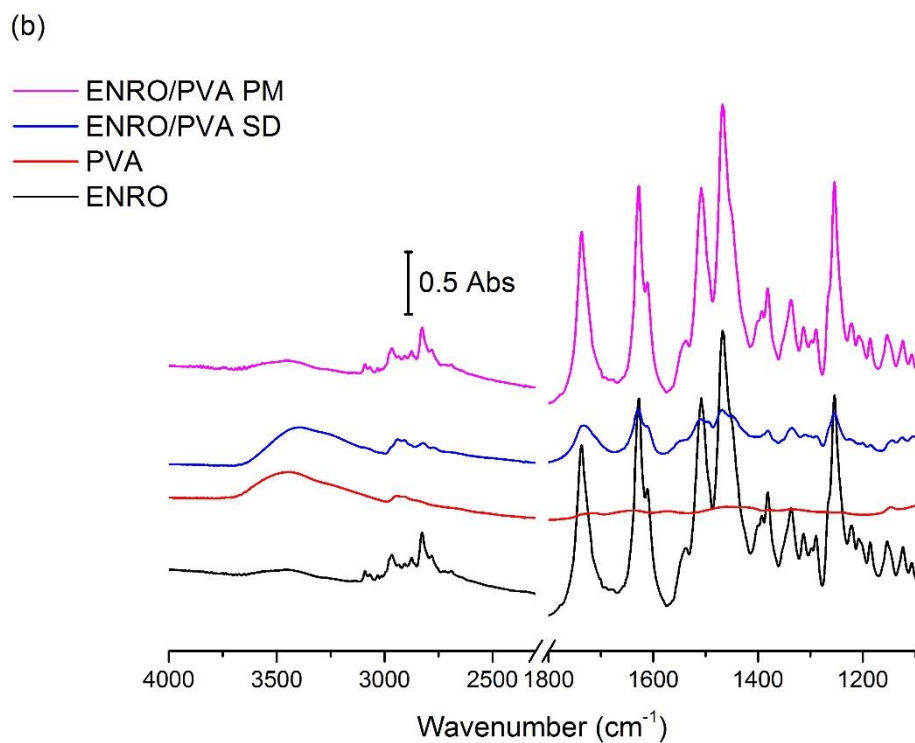

**Figure S3.** FTIR spectra of ENRO semi-crystalline solid dispersions (SD) and physical mixtures (PM) containing (a) 50% (w/w) PVP, and (b) 40% (w/w) PVA.

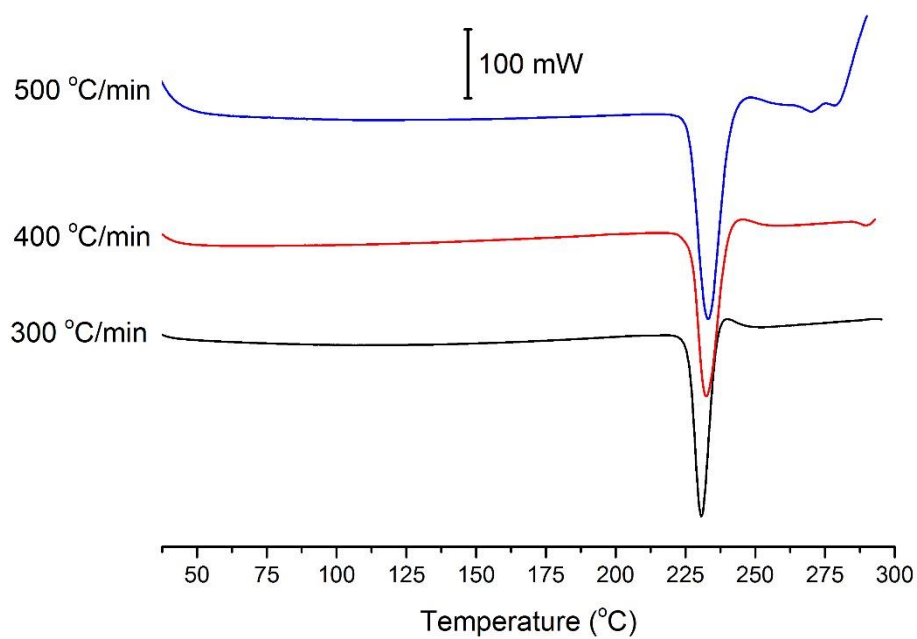

**Figure S4.** HSDSC analysis of crystalline ENRO using various heating rates.

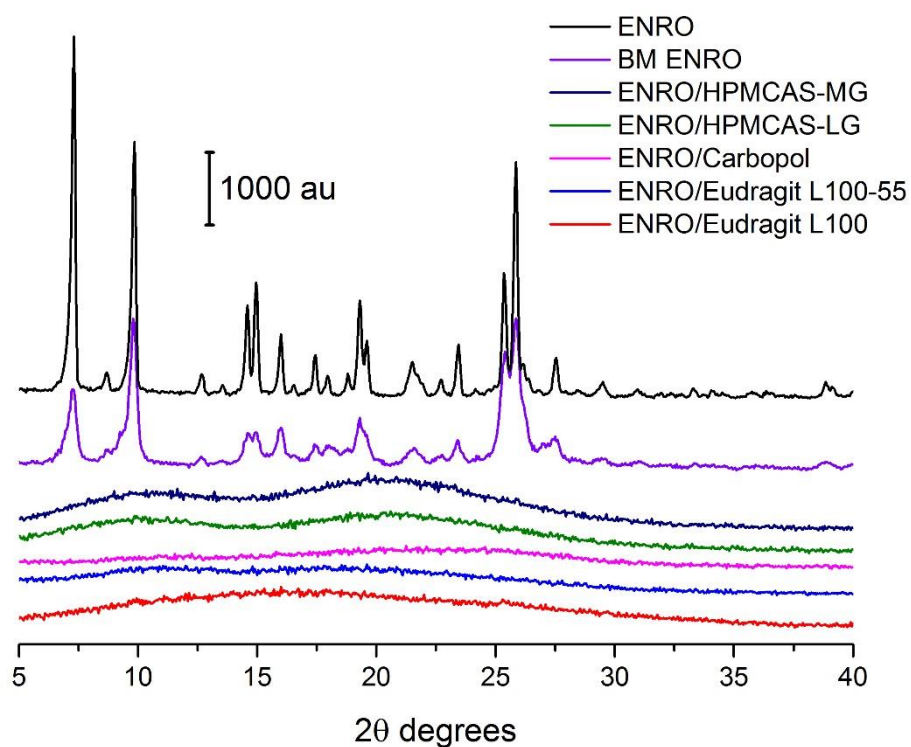

**Figure S5.** PXRD analysis of ENRO and ENRO ASDs following DVS studies.

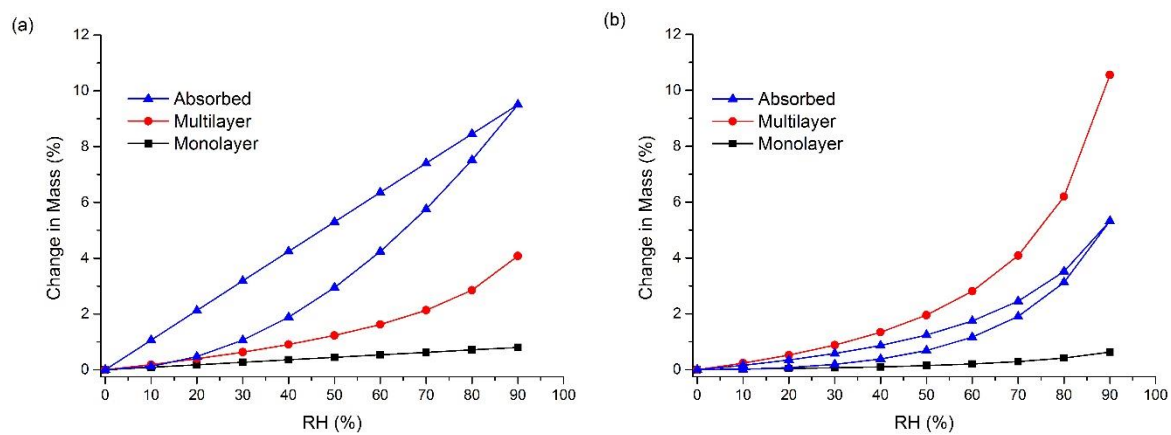

**Figure S6.** Water distribution patterns according to the Young-Nelson model in ENRO ASDs containing (a) Eudragit L100-55 40% (w/w) and (b) HPMCAS-MG 60% (w/w).

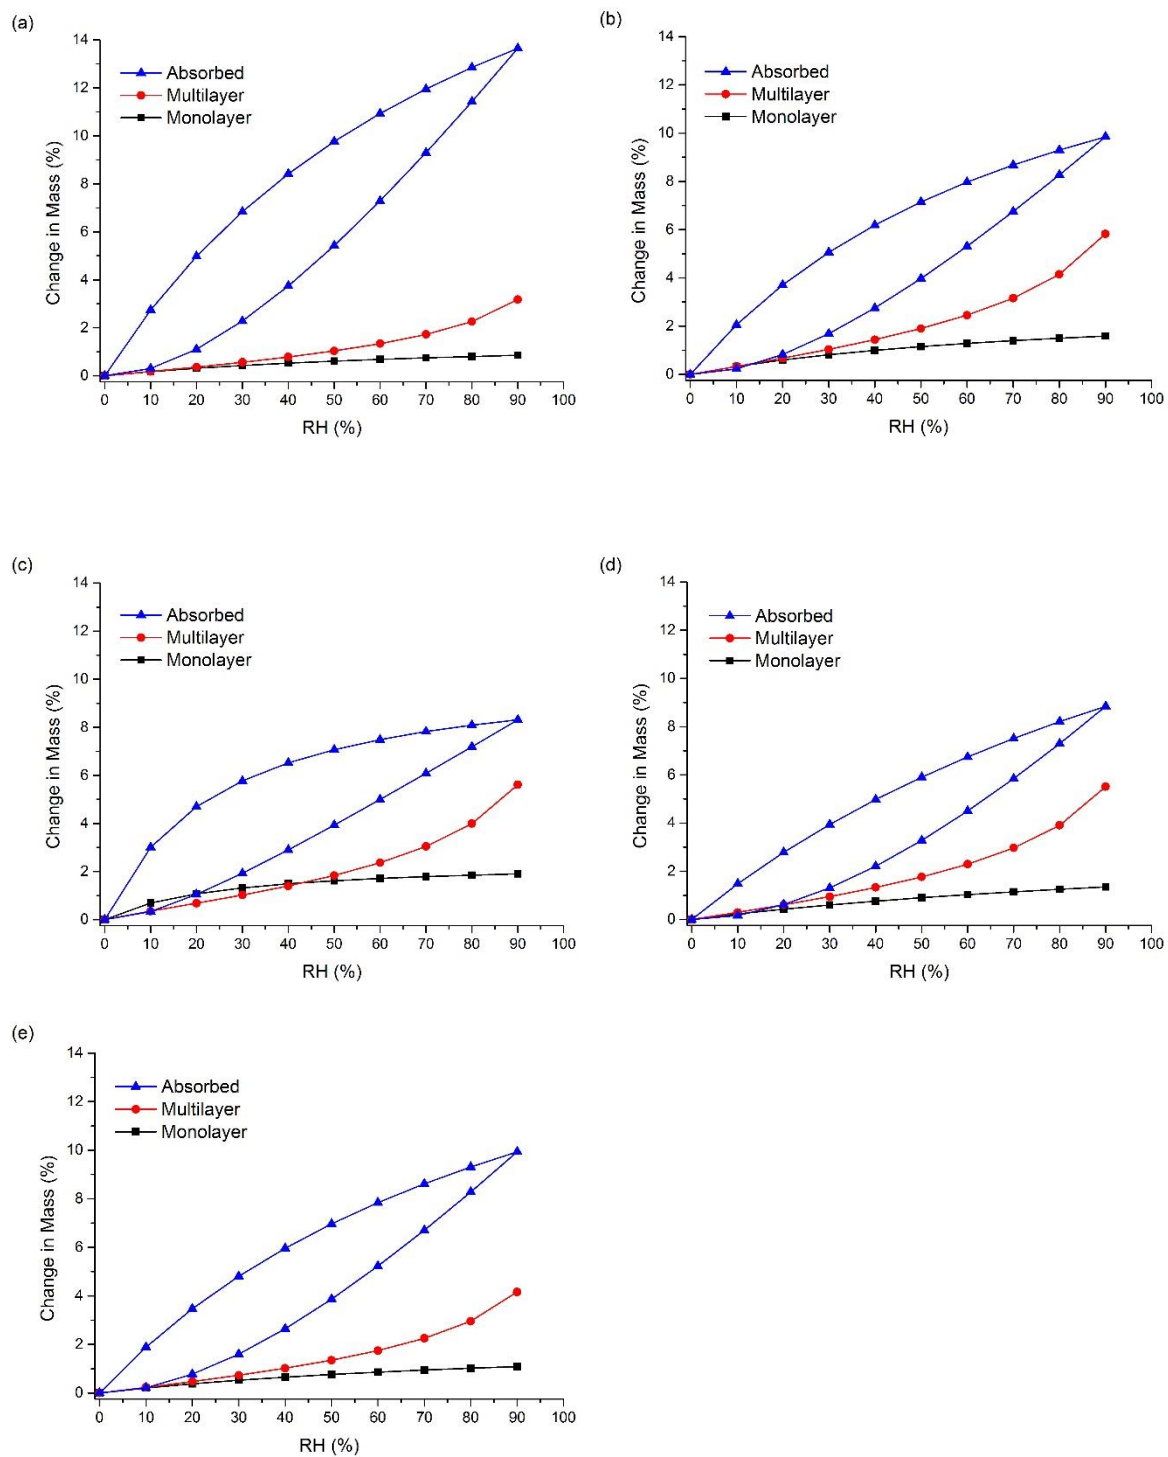

**Figure S7.** Water distribution patterns according to the Young-Nelson model in CIP ASDs containing (a) Eudragit L100 40% (w/w) (b) Eudragit L100-55 40% (w/w) (c) Carbopol 40% (w/w) (d) HPMCAS-LG 60% (w/w) and (e) HPMCAS-MG 60% (w/w).

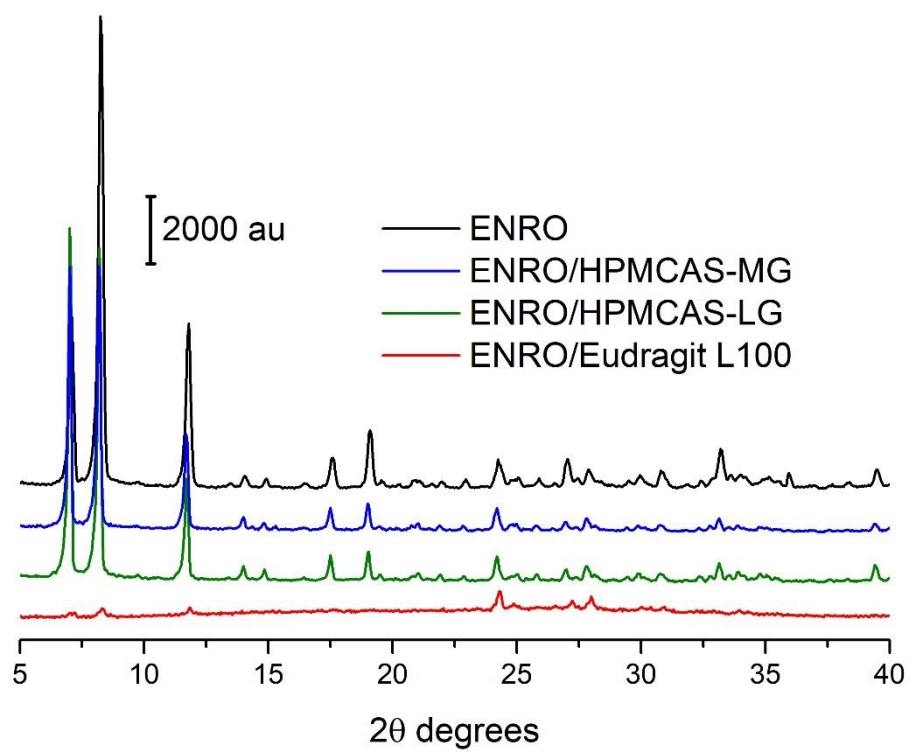

**Figure S8.** PXRD analysis of ENRO and ENRO ASDs following solubility studies in FaSSIF.

**Table S1.** Parameters Estimated from Young-Nelson Model for the CIP and ENRO ASDs

| <b>ASD</b>            | <b>A<sup>a</sup></b> | <b>B<sup>b</sup></b> | <b>E<sup>c</sup></b> | <b>r<sup>d</sup></b> |
|-----------------------|----------------------|----------------------|----------------------|----------------------|
| ENRO/Eudragit L100    | 0.007                | 0.151                | 0.990                | 0.981                |
| ENRO/Eudragit L100-55 | 0.009                | 0.117                | 0.990                | 0.978                |
| ENRO/Carbopol         | 0.022                | 0.083                | 0.209                | 0.998                |
| ENRO/HPMCAS-LG        | 0.012                | 0.101                | 6.330                | 0.991                |
| ENRO/HPMCAS-MG        | 0.011                | 0.100                | 6.281                | 0.989                |
| CIP/Eudragit L100     | 0.009                | 0.160                | 0.471                | 0.997                |
| CIP/Eudragit L100-55  | 0.017                | 0.115                | 0.447                | 0.991                |
| CIP/Carbopol          | 0.019                | 0.094                | 0.203                | 0.999                |
| CIP/HPMCAS-LG         | 0.014                | 0.105                | 0.597                | 0.995                |
| CIP/HPMCAS-MG         | 0.011                | 0.117                | 0.507                | 0.996                |

<sup>a</sup>A: fraction of adsorbed water. <sup>b</sup>B: fraction of absorbed water. <sup>c</sup>E: equilibrium constant. <sup>d</sup>r: correlation coefficient.
